# Supplementary material for: Una poesía de la verdad: Libros
Source: MDPI journal article supplement (doi:10.3390/polym13081217), 1988-01-01
Supplement: s1 [file s1]

## Supporting Information

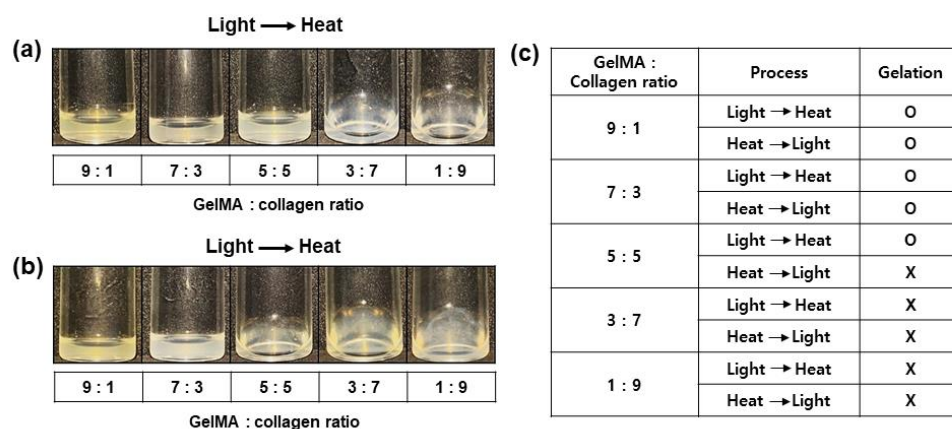

**Figure S1.** Analysis of the gelation of the hydrogel with respect to the GelMA/collagen ratio. Images of gelation of the hydrogel by applying an UV light after the heat (a). Images of the gelation of the hydrogel by applying heat after UV light (b). Table of the gelation of the hydrogel (c).

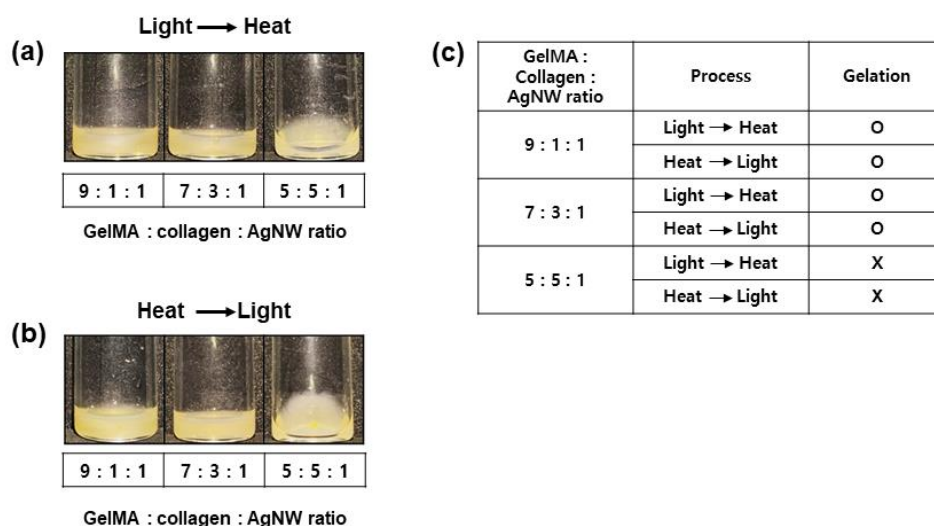

**Figure S2.** Analysis of the gelation of the hydrogel with respect to the GelMA/collagen/AgNW ratio. Images of the gelation of the hydrogel by applying an UV light after the heat (a). Images of the gelation of the hydrogel by applying heat after the UV light (b). Table of the gelation of the hydrogel (c).
